# Supplementary material
Source: MDPI journal article supplement (https://www.mdpi.com/2624-781X/4/3/26)
Supplement: s1 [file s1]

# Supporting Information

Article

## Various Techniques for the Synthesis of 2-Nitrophenylamino-1,4-naphthoquinone Derivatives

Elisa Leyva, Silvia E. Loredó-Carrillo \* and Johana Aguilar

Facultad de Ciencias Químicas, Universidad Autónoma de San Luis Potosí, Manuel Nava No. 6, Zona Universitaria, San Luis Potosí 78210, SLP, Mexico; elisa@uaslp.mx (E.L.); johana.aguilar@uaslp.mx (J.A.)

\* Correspondence: silvia.loredo@uaslp.mx

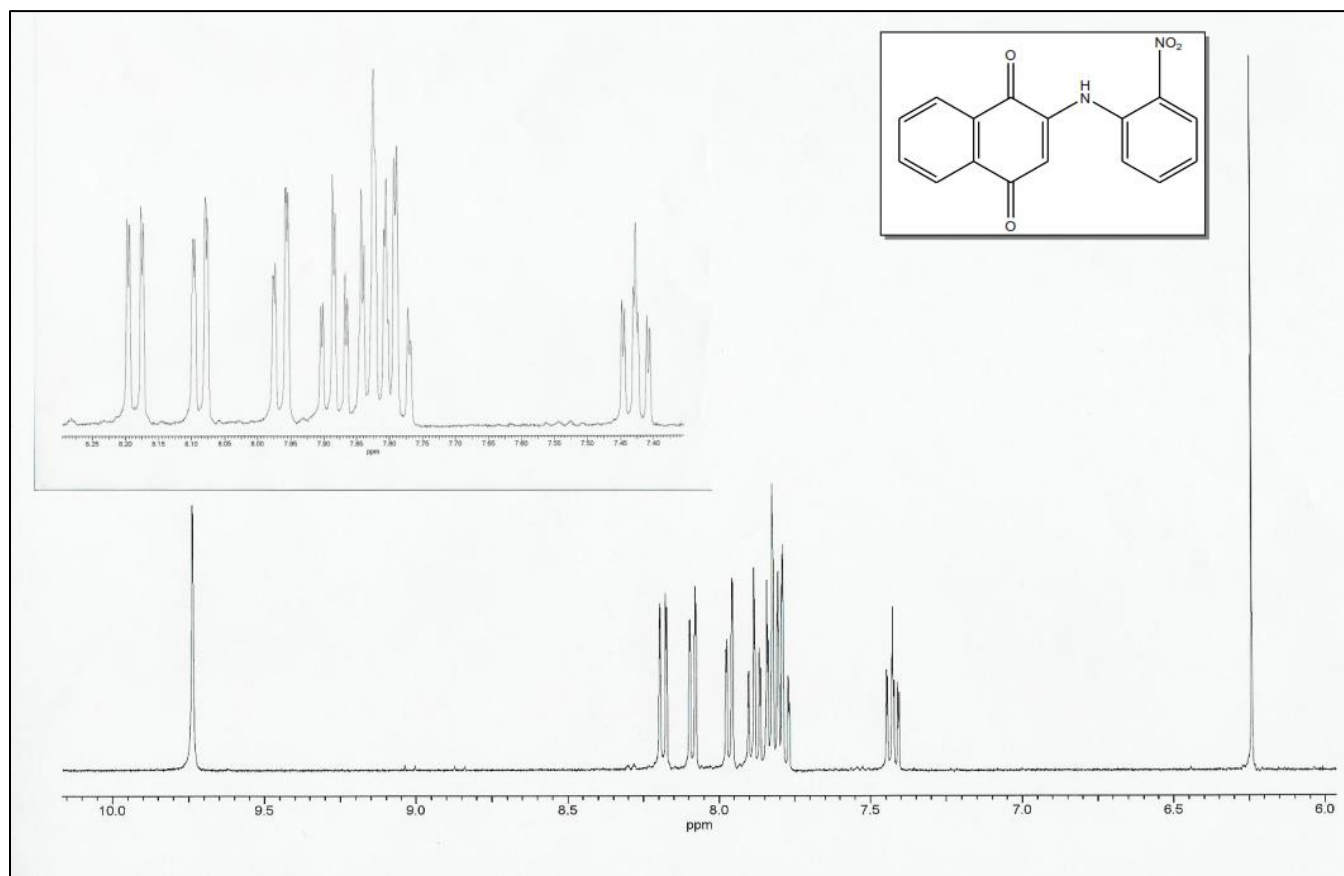

Figure S1. <sup>1</sup>H spectrum to:2-(2-nitrophenylamino)-1,4-naphthoquinone.

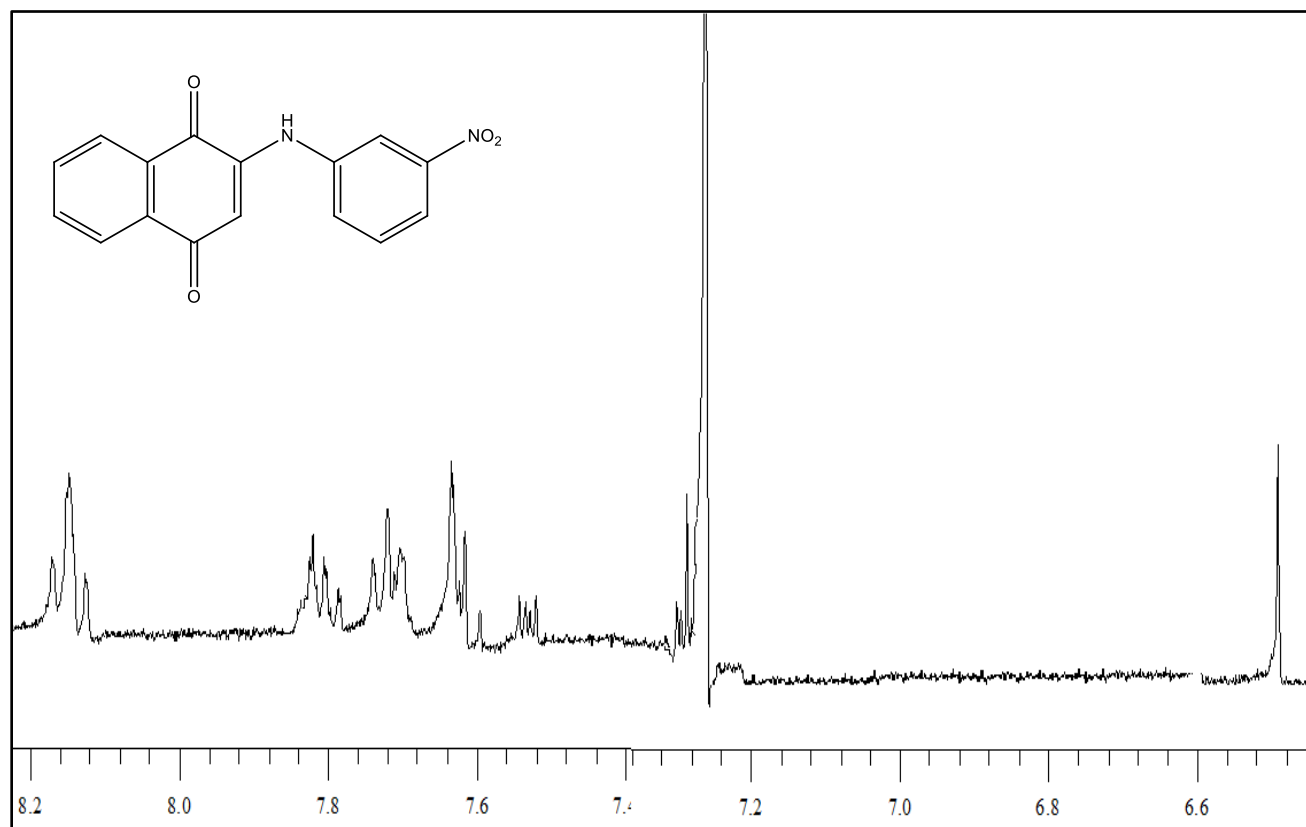

Figure S2. <sup>1</sup>H spectrum to: 2-(3-nitrophenylamino)-1,4-naphthoquinone.

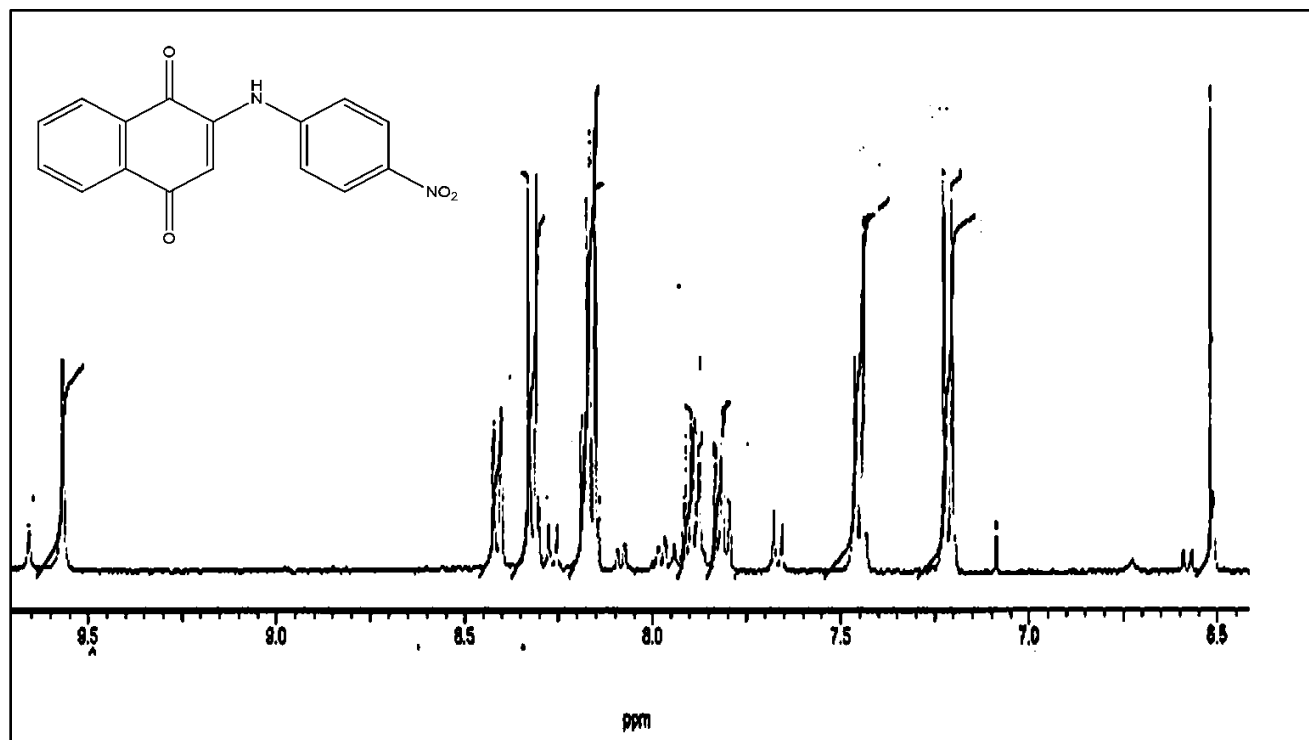

Figure S3. <sup>1</sup>H spectrum to: 2-(4-nitrophenylamino)-1,4-naphthoquinone.

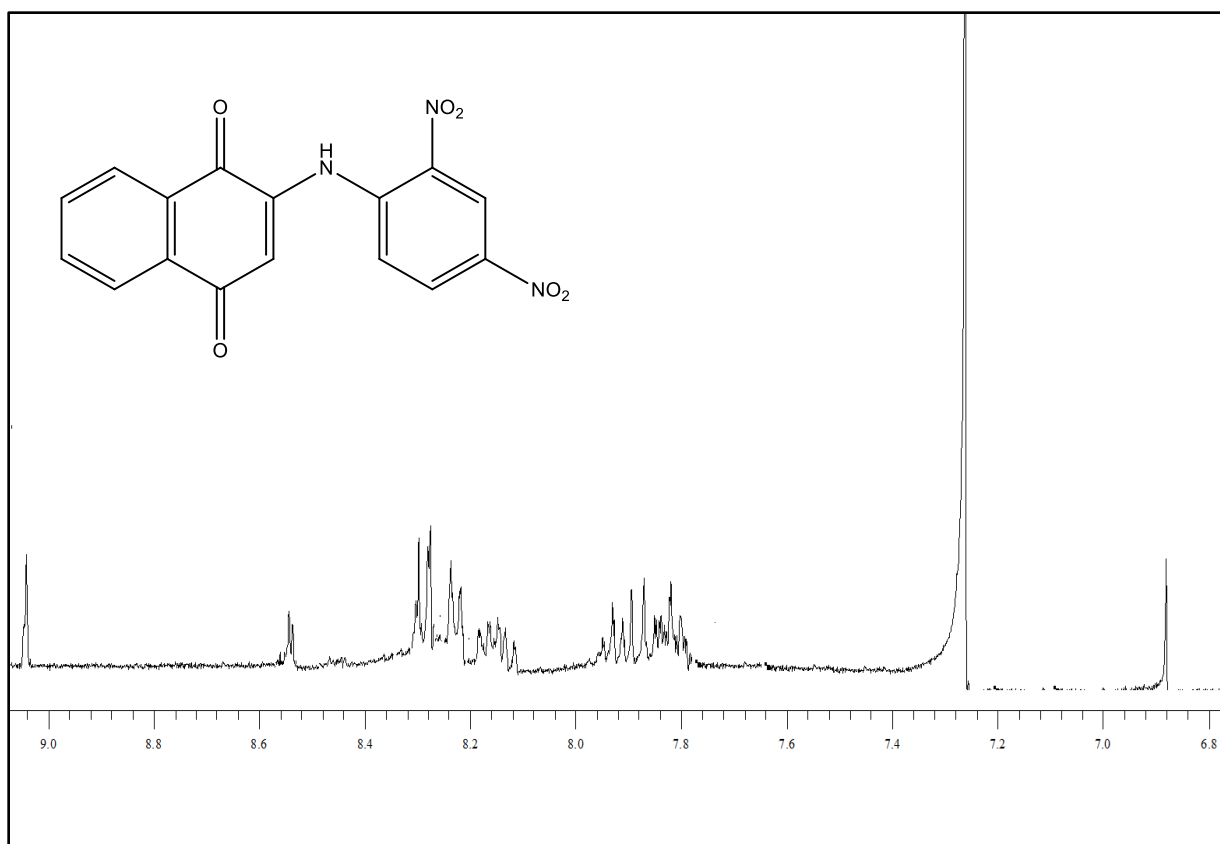

Figure S4-. <sup>1</sup>H spectrum to: 2-(2,4-dinitrophenylamino)-1,4-naphthoquinone.

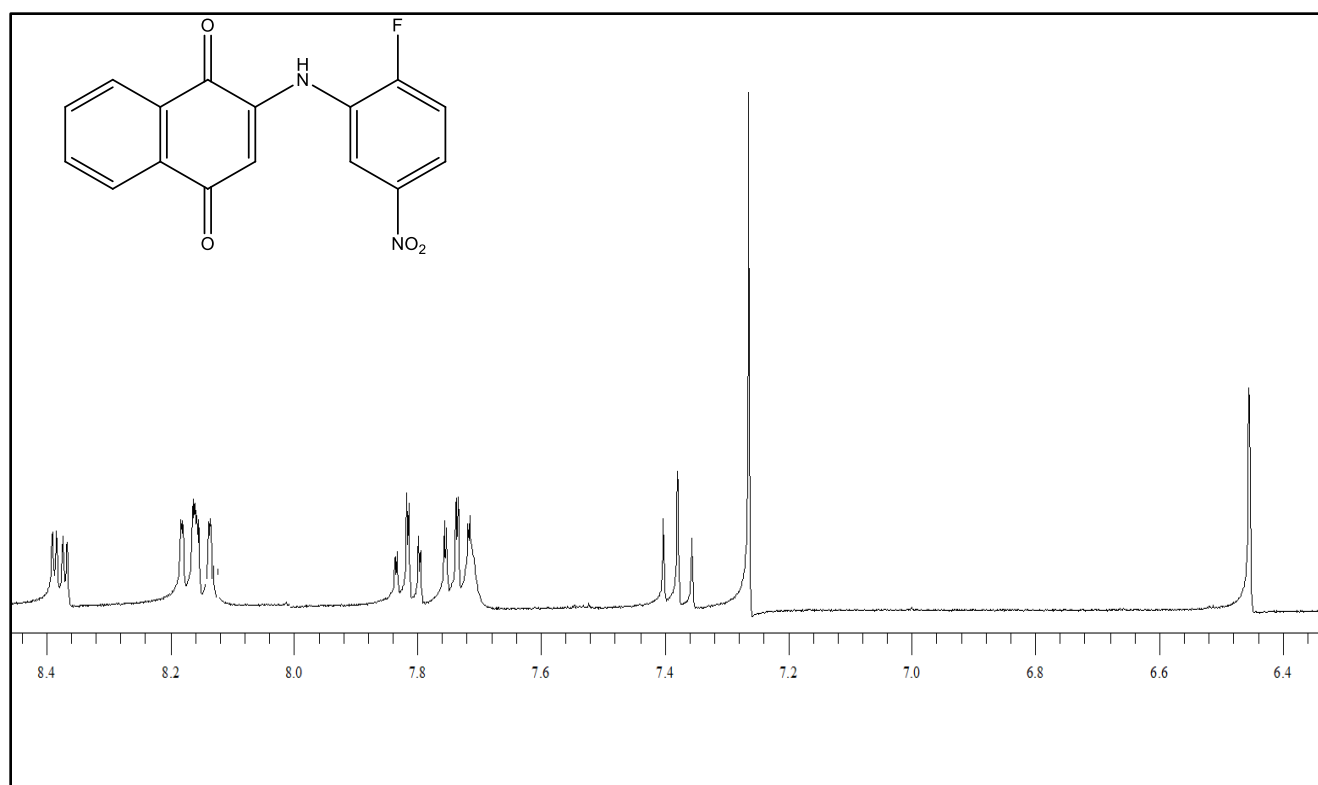

Figure S5: <sup>1</sup>H spectrum to: 2-(2-fluoro-5-nitrophenylamino)-1,4-naphthoquinone.

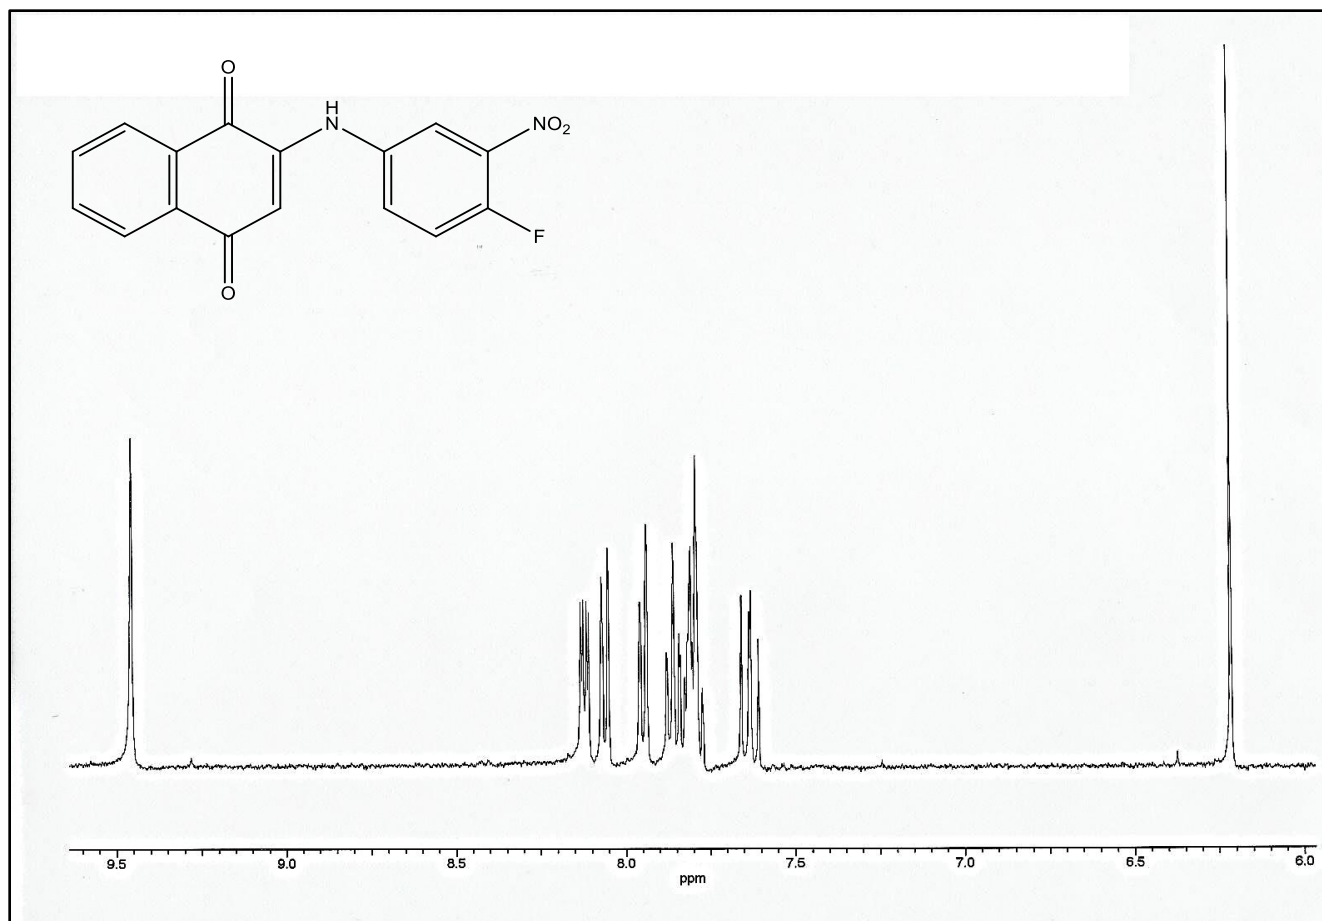

Figure S6. <sup>1</sup>H spectrum to: 2-(4-fluoro-3-nitrophenylamino)-1,4-naphthoquinone.

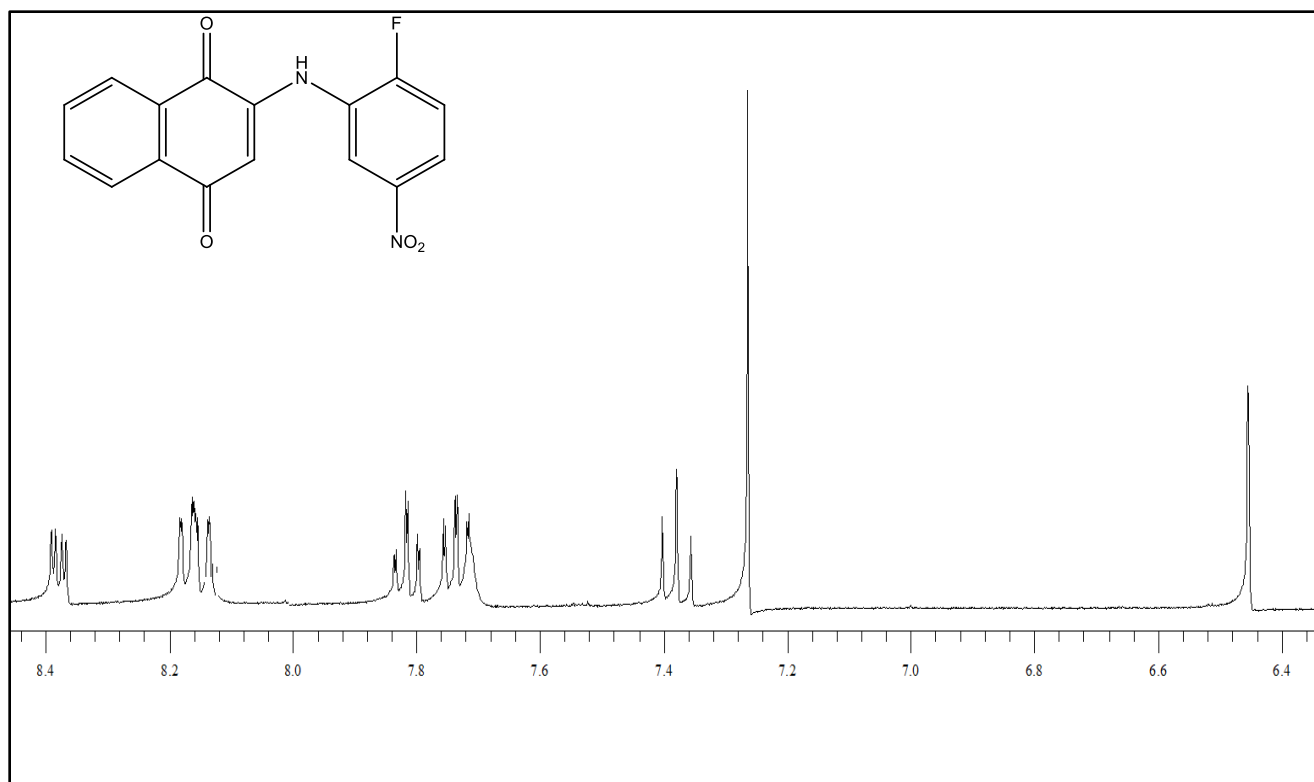

Figure S7. <sup>1</sup>H spectrum to: 2-(2-fluoro-4-nitrophenylamino)-1,4-naphthoquinone.

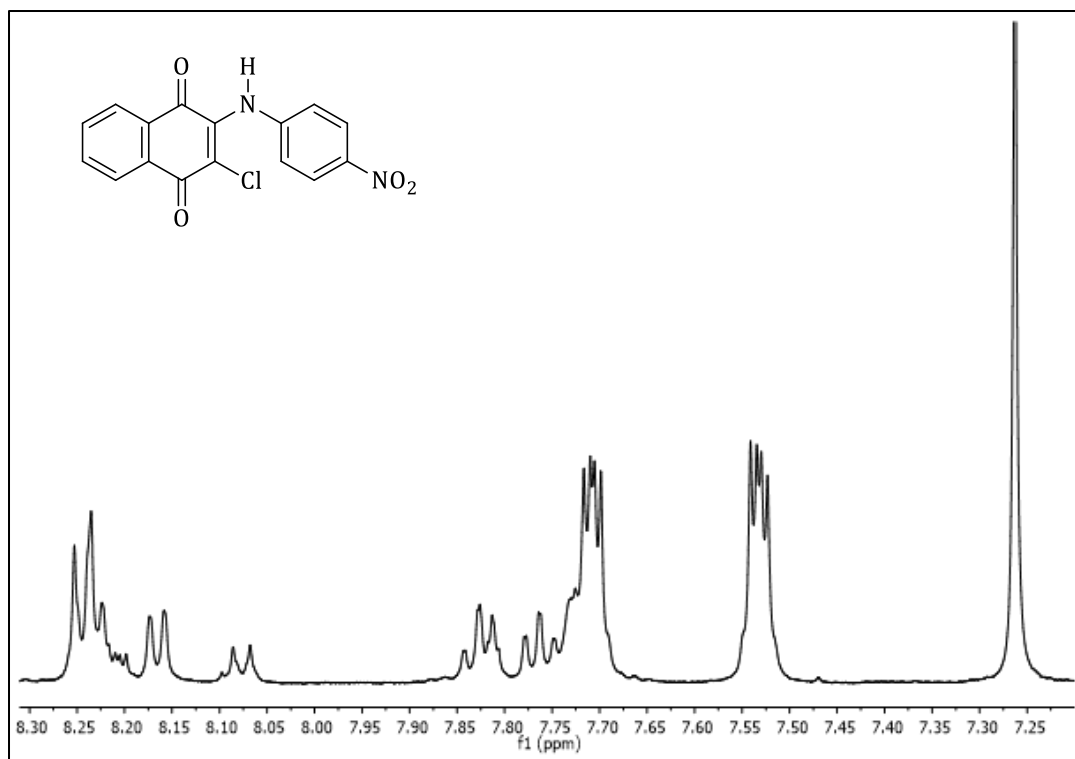

Figure S8. <sup>1</sup>H spectrum to: *3-chloro-2-(4-nitrophenylamino)-1,4-naphthoquinone*.

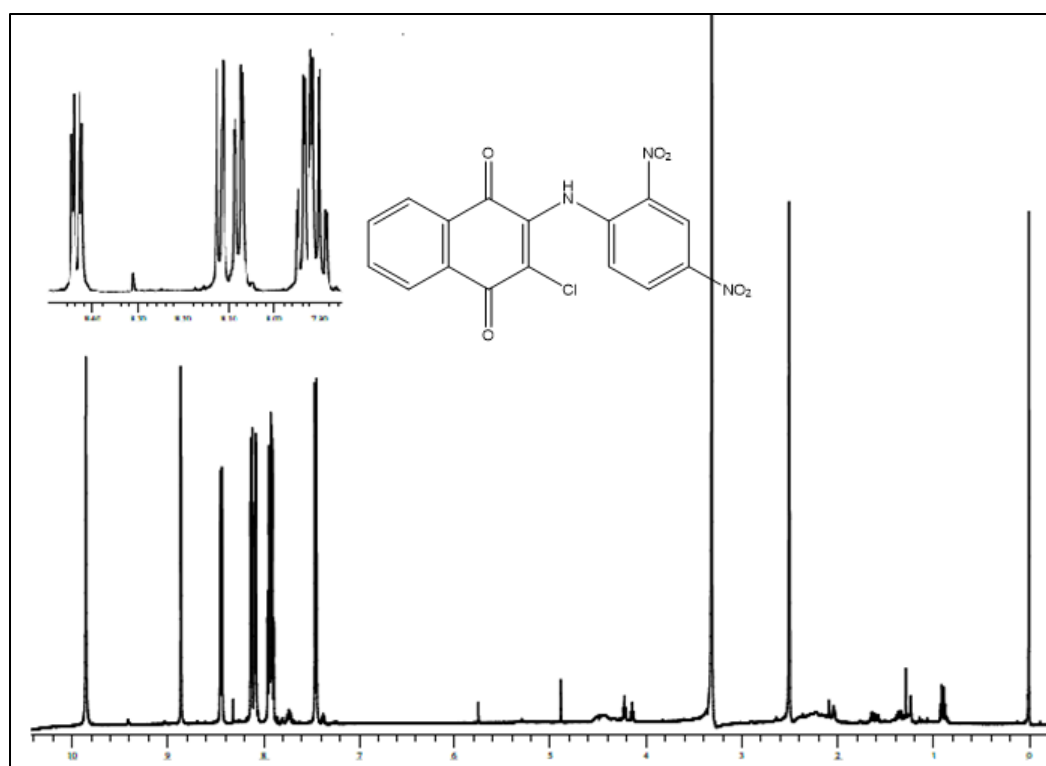

Figure S9. <sup>1</sup>H spectrum to: *3-chloro-2-(2,4-dinitrophenylamino)-1,4-naphthoquinone*.

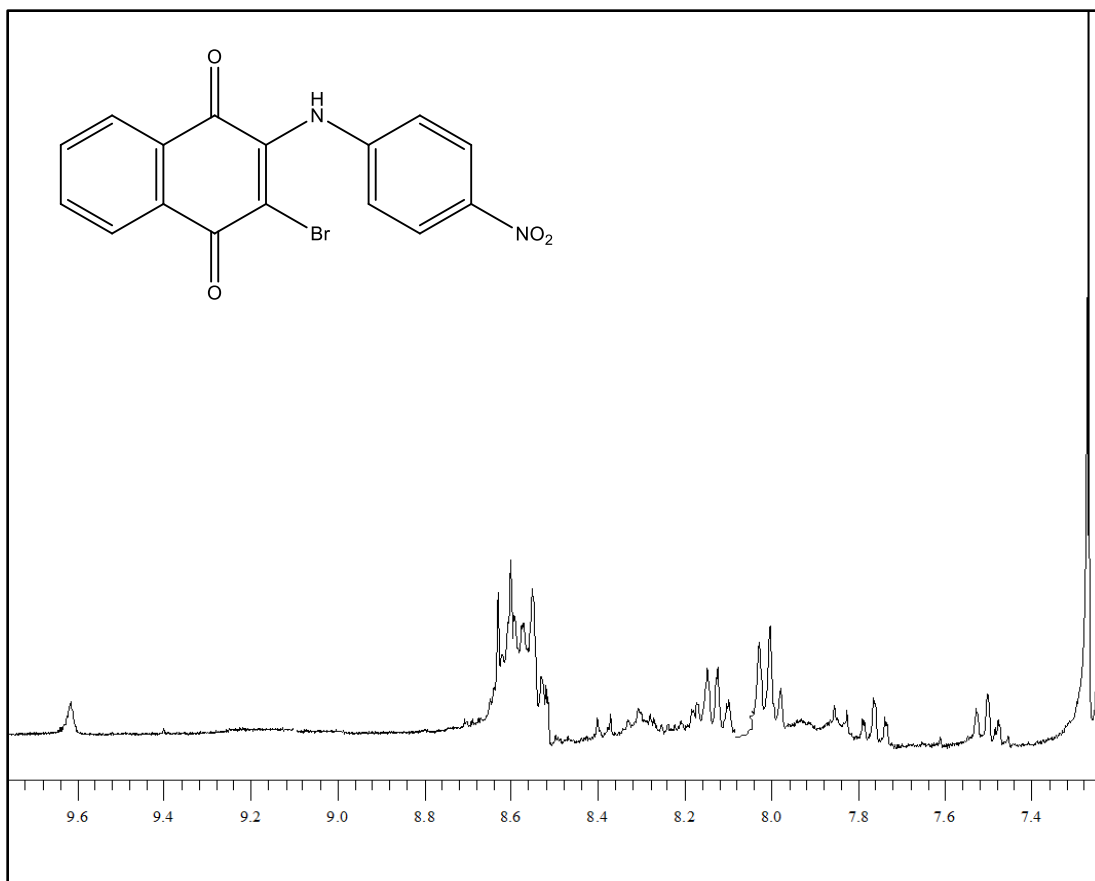

Figure S10. <sup>1</sup>H spectrum to: *3-bromo-2-(4-nitrophenylamino)-1,4-naphthoquinone*.

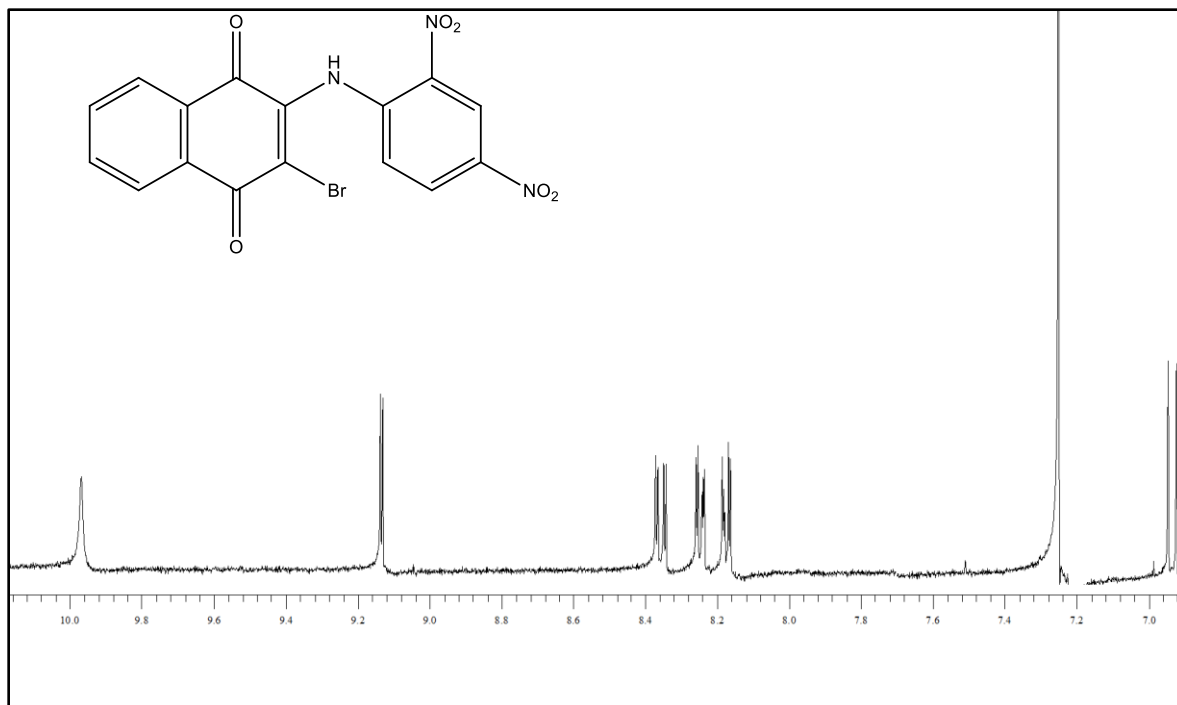

Figure S11. <sup>1</sup>H spectrum to: *3-bromo-2-(2,4-nitrophenylamino)-1,4-naphthoquinone*.
