# Supplementary material
Source: MDPI journal article supplement (https://www.mdpi.com/2624-781X/4/3/26)
Supplement: s1 [file s1]

Archive with 1 entries (1 files):
- reactions-2467107-supplementary.pdf
